# Supplementary material for: Drying Induced Impact on Composition and Oil Quality of Rosemary Herb, Rosmarinus Officinalis Linn
Source: PubMed Central journal article supplement (PMC7355710; doi:10.3390/molecules25122830), 2020-06-19
Supplement: molecules-25-02830-s001.pdf [file molecules-25-02830-s001.pdf]

# Drying induced impact on composition and oil quality of rosemary herb, *Rosmarinus Officinalis* Linn.

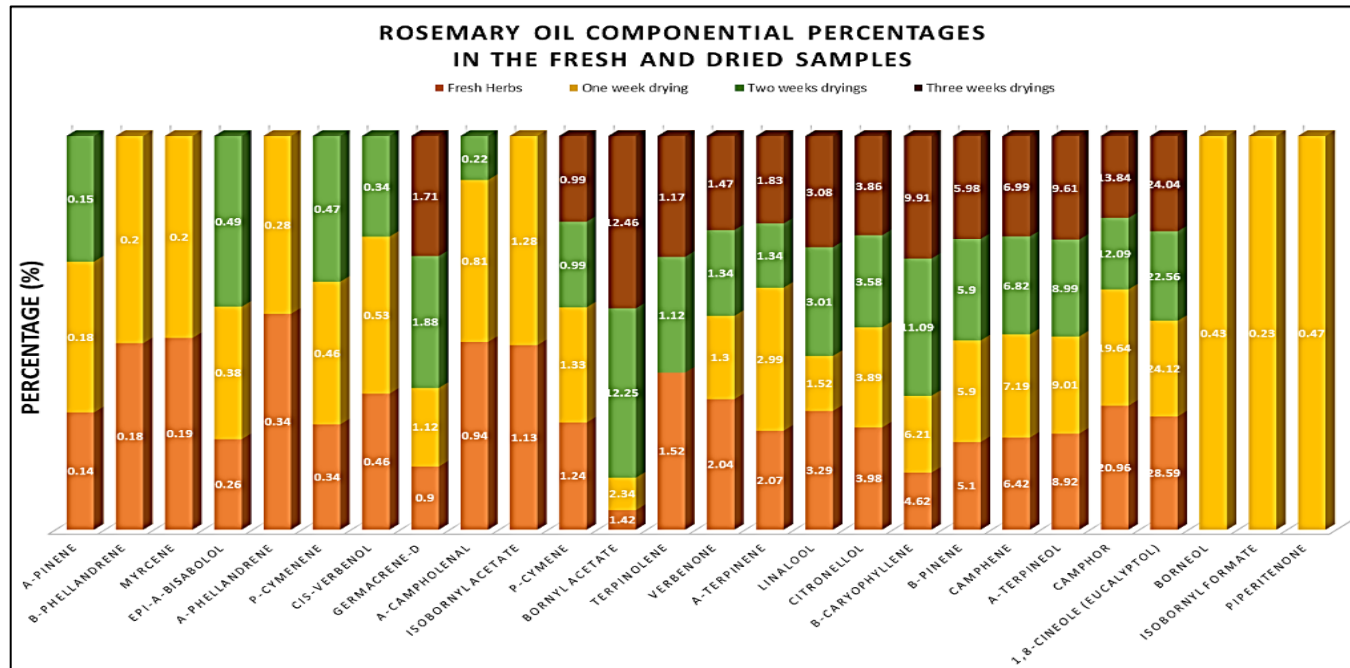

**Figure S1:** Rosemary oils' componential percentages in fresh and dried samples
